# Supplementary material for: Digestive Stability and Bioaccessibility of Antioxidants in Prickly Pear Fruits from the Canary Islands: Healthy Foods and Ingredients
Source: MDPI journal article supplement (doi:10.3390/antiox9020164), 2020-02-17
Supplement: s1 [file s1]

Supplementary Table S2. Bioactive content (mg/100g fresh weight) in prickly pear peels during in vitro simulated gastrointestinal digestion.

| Compounds                        | Colorada                    |                             |                             |                             | Fresa                      |                             |                             |                             |
|----------------------------------|-----------------------------|-----------------------------|-----------------------------|-----------------------------|----------------------------|-----------------------------|-----------------------------|-----------------------------|
|                                  | Fruit                       | Oral                        | Gastric                     | Intestinal                  | Fruit                      | Oral                        | Gastric                     | Intestinal                  |
| Indicaxanthin                    | 5.98 ± 0.19 <sup>d</sup>    | 6.10 ± 0.03 <sup>c</sup>    | 5.59 ± 0.09 <sup>b</sup>    | 4.08 ± 0.11 <sup>a</sup>    | 1.24 ± 0.06 <sup>c</sup>   | 1.20 ± 0.01 <sup>b</sup>    | 1.31 ± 0.07 <sup>b</sup>    | 0.87 ± 0.00 <sup>a</sup>    |
| Betanin                          | 0.54 ± 0.02 <sup>b</sup>    | 0.48 ± 0.07 <sup>b</sup>    | 0.54 ± 0.03 <sup>b</sup>    | 0.29 ± 0.03 <sup>a</sup>    | 9.54 ± 0.59 <sup>b</sup>   | 9.94 ± 1.09 <sup>b</sup>    | 8.53 ± 0.09 <sup>b</sup>    | 3.68 ± 0.22 <sup>a</sup>    |
| Piscidic acid                    | 407.35 ± 13.44 <sup>b</sup> | 430.07 ± 11.65 <sup>c</sup> | 452.90 ± 5.59 <sup>c</sup>  | 221.21 ± 8.07 <sup>a</sup>  | 396.88 ± 9.99 <sup>b</sup> | 442.99 ± 22.84 <sup>b</sup> | 451.17 ± 20.32 <sup>b</sup> | 217.64 ± 21.90 <sup>a</sup> |
| 4-hydroxybenzoic acid derivative | 14.62 ± 0.41 <sup>b</sup>   | 15.01 ± 0.33 <sup>b</sup>   | 16.02 ± 0.32 <sup>b</sup>   | 7.49 ± 0.11 <sup>a</sup>    | 9.17 ± 0.16 <sup>b</sup>   | 11.33 ± 1.19 <sup>b</sup>   | 11.48 ± 0.44 <sup>b</sup>   | 6.04 ± 0.31 <sup>a</sup>    |
| IG1                              | 1.80 ± 0.03 <sup>b</sup>    | 1.89 ± 0.05 <sup>b</sup>    | 1.92 ± 0.02 <sup>b</sup>    | 0.82 ± 0.08 <sup>a</sup>    | 2.17 ± 0.19 <sup>b</sup>   | 2.24 ± 0.04 <sup>b</sup>    | 2.23 ± 0.27 <sup>b</sup>    | 1.12 ± 0.15 <sup>a</sup>    |
| IG2                              | 1.61 ± 0.03 <sup>b</sup>    | 1.85 ± 0.04 <sup>c</sup>    | 1.82 ± 0.27 <sup>c</sup>    | 0.84 ± 0.00 <sup>a</sup>    | 2.21 ± 0.21 <sup>b</sup>   | 2.26 ± 0.10 <sup>b</sup>    | 2.43 ± 0.03 <sup>b</sup>    | 1.13 ± 0.06 <sup>a</sup>    |
| IG3                              | 0.48 ± 0.01 <sup>b</sup>    | 0.50 ± 0.03 <sup>b</sup>    | 0.59 ± 0.18 <sup>b</sup>    | 0.24 ± 0.03 <sup>a</sup>    | 0.64 ± 0.03 <sup>b</sup>   | 0.71 ± 0.12 <sup>b</sup>    | 0.68 ± 0.05 <sup>b</sup>    | 0.35 ± 0.14 <sup>a</sup>    |
| IG4                              | 0.95 ± 0.01 <sup>b</sup>    | 1.04 ± 0.03 <sup>b</sup>    | 1.10 ± 0.00 <sup>b</sup>    | 0.47 ± 0.11 <sup>a</sup>    | 1.38 ± 0.06 <sup>b</sup>   | 1.33 ± 0.02 <sup>b</sup>    | 1.36 ± 0.15 <sup>b</sup>    | 0.70 ± 0.08 <sup>a</sup>    |
| IG7                              | n.d. <sup>a</sup>           | n.d. <sup>a</sup>           | n.d. <sup>a</sup>           | n.d. <sup>a</sup>           | n.d. <sup>a</sup>          | n.d. <sup>a</sup>           | n.d. <sup>a</sup>           | n.d. <sup>a</sup>           |
| IG5                              | 2.85 ± 0.07 <sup>c</sup>    | 2.30 ± 0.02 <sup>b</sup>    | 1.94 ± 0.40 <sup>b</sup>    | 0.91 ± 0.16 <sup>a</sup>    | 3.21 ± 0.07 <sup>d</sup>   | 2.39 ± 0.02 <sup>c</sup>    | 1.96 ± 0.00 <sup>b</sup>    | 1.04 ± 0.07 <sup>a</sup>    |
| Compounds                        | Blanco Buenavista           |                             |                             |                             | Blanco Fasnía              |                             |                             |                             |
|                                  | Fruit                       | Oral                        | Gastric                     | Intestinal                  | Fruit                      | Oral                        | Gastric                     | Intestinal                  |
| Indicaxanthin                    | 0.03 ± 0.00 <sup>b</sup>    | 0.02 ± 0.00 <sup>b</sup>    | n.d. <sup>a</sup>           | n.d. <sup>a</sup>           | 0.02 ± 0.00 <sup>ab</sup>  | 0.02 ± 0.00 <sup>ab</sup>   | n.d. <sup>a</sup>           | n.d. <sup>a</sup>           |
| Betanin                          | 0.02 ± 0.00 <sup>b</sup>    | n.d. <sup>a</sup>           | n.d. <sup>a</sup>           | n.d. <sup>a</sup>           | 0.01 ± 0.00 <sup>b</sup>   | n.d. <sup>a</sup>           | n.d. <sup>a</sup>           | n.d. <sup>a</sup>           |
| Piscidic acid                    | 423.61 ± 37.96 <sup>b</sup> | 410.67 ± 24.88 <sup>b</sup> | 400.65 ± 29.39 <sup>b</sup> | 338.46 ± 30.83 <sup>a</sup> | 307.95 ± 1.26 <sup>b</sup> | 320.76 ± 36.37 <sup>b</sup> | 315.26 ± 78.06 <sup>b</sup> | 213.59 ± 19.83 <sup>a</sup> |
| 4-hydroxybenzoic acid derivative | 4.88 ± 0.42 <sup>b</sup>    | 3.76 ± 0.28 <sup>a</sup>    | 3.53 ± 0.33 <sup>a</sup>    | 3.36 ± 0.50 <sup>a</sup>    | 7.10 ± 0.06 <sup>b</sup>   | 8.53 ± 0.90 <sup>b</sup>    | 8.41 ± 2.17 <sup>b</sup>    | 5.47 ± 0.46 <sup>a</sup>    |
| IG1                              | 1.11 ± 0.02 <sup>b</sup>    | 0.72 ± 0.05 <sup>a</sup>    | 0.78 ± 0.06 <sup>a</sup>    | 0.60 ± 0.20 <sup>a</sup>    | 1.40 ± 0.01 <sup>b</sup>   | 1.44 ± 0.15 <sup>b</sup>    | 1.36 ± 0.39 <sup>b</sup>    | 0.90 ± 0.06 <sup>a</sup>    |
| IG2                              | 0.53 ± 0.01 <sup>b</sup>    | 0.39 ± 0.03 <sup>a</sup>    | 0.41 ± 0.03 <sup>a</sup>    | 0.32 ± 0.11 <sup>a</sup>    | 1.38 ± 0.01 <sup>b</sup>   | 1.42 ± 0.15 <sup>b</sup>    | 1.31 ± 0.17 <sup>b</sup>    | 0.97 ± 0.07 <sup>a</sup>    |
| IG3                              | 0.13 ± 0.00 <sup>b</sup>    | 0.05 ± 0.00 <sup>a</sup>    | n.d. <sup>a</sup>           | n.d. <sup>a</sup>           | 0.44 ± 0.00 <sup>b</sup>   | 0.51 ± 0.04 <sup>b</sup>    | 0.49 ± 0.03 <sup>b</sup>    | 0.28 ± 0.02 <sup>a</sup>    |
| IG4                              | 0.16 ± 0.05 <sup>a</sup>    | 0.17 ± 0.01 <sup>a</sup>    | 0.33 ± 0.01 <sup>b</sup>    | 0.13 ± 0.03 <sup>a</sup>    | 0.72 ± 0.04 <sup>b</sup>   | 0.81 ± 0.07 <sup>b</sup>    | 0.72 ± 0.21 <sup>b</sup>    | 0.52 ± 0.02 <sup>a</sup>    |
| IG7                              | 1.25 ± 0.07 <sup>c</sup>    | 1.15 ± 0.05 <sup>c</sup>    | 0.70 ± 0.06 <sup>b</sup>    | 0.37 ± 0.15 <sup>a</sup>    | n.d. <sup>a</sup>          | n.d. <sup>a</sup>           | n.d. <sup>a</sup>           | n.d. <sup>a</sup>           |
| IG5                              | 1.15 ± 0.05 <sup>c</sup>    | 0.52 ± 0.04 <sup>b</sup>    | 0.54 ± 0.02 <sup>b</sup>    | 0.30 ± 0.08 <sup>a</sup>    | 2.03 ± 0.00 <sup>b</sup>   | 2.30 ± 0.17 <sup>b</sup>    | 2.10 ± 0.24 <sup>b</sup>    | 1.28 ± 0.14 <sup>a</sup>    |

Results were expressed as mean ± standard deviation ( $n=4$ ). This came from obtaining at least two independent digestions ( $n=2$ ) and performing the determinations of each two times ( $n=2$ ). Superscript letters indicate statistically significant differences ( $p \leq 0.05$ ) between the fruit and the digestive stages for each variety and compound. Abbreviations: n.d.: not detected.
