# Supplementary material for: Digestive Stability and Bioaccessibility of Antioxidants in Prickly Pear Fruits from the Canary Islands: Healthy Foods and Ingredients
Source: MDPI journal article supplement (doi:10.3390/antiox9020164), 2020-02-17
Supplement: s1 [file s1]

Supplementary Table S1. Bioactive content (mg/100g fresh weight) in prickly pear pulps during *in vitro* simulated gastrointestinal digestion.

| Compounds                        | Colorada                  |                           |                           |                           | Fresa                     |                           |                           |                           |
|----------------------------------|---------------------------|---------------------------|---------------------------|---------------------------|---------------------------|---------------------------|---------------------------|---------------------------|
|                                  | Fruit                     | Oral                      | Gastric                   | Intestinal                | Fruit                     | Oral                      | Gastric                   | Intestinal                |
| Indicaxanthin                    | 11.79 ± 0.15 <sup>c</sup> | 11.54 ± 0.03 <sup>c</sup> | 8.67 ± 0.05 <sup>b</sup>  | 6.87 ± 0.19 <sup>a</sup>  | 4.01 ± 0.14 <sup>b</sup>  | 4.12 ± 0.15 <sup>b</sup>  | 4.01 ± 0.35 <sup>b</sup>  | 2.76 ± 0.07 <sup>a</sup>  |
| Betanin                          | 0.62 ± 0.02 <sup>c</sup>  | 0.34 ± 0.00 <sup>b</sup>  | 0.49 ± 0.07 <sup>b</sup>  | 0.28 ± 0.02 <sup>a</sup>  | 11.17 ± 0.28 <sup>c</sup> | 12.32 ± 0.35 <sup>c</sup> | 9.36 ± 0.74 <sup>b</sup>  | 5.09 ± 0.48 <sup>a</sup>  |
| Piscidic acid                    | 47.49 ± 0.05 <sup>b</sup> | 25.21 ± 1.49 <sup>a</sup> | 26.76 ± 0.48 <sup>a</sup> | 22.19 ± 2.05 <sup>a</sup> | 36.53 ± 0.20 <sup>c</sup> | 30.18 ± 0.04 <sup>b</sup> | 27.24 ± 2.06 <sup>b</sup> | 14.08 ± 2.41 <sup>a</sup> |
| 4-hydroxybenzoic acid derivative | 1.18 ± 0.01 <sup>b</sup>  | 1.00 ± 0.02 <sup>b</sup>  | 0.25 ± 0.04 <sup>a</sup>  | 0.20 ± 0.04 <sup>a</sup>  | 0.83 ± 0.03 <sup>d</sup>  | 0.70 ± 0.06 <sup>c</sup>  | 0.32 ± 0.03 <sup>b</sup>  | 0.19 ± 0.02 <sup>a</sup>  |
| Compounds                        | Blanco Buenavista         |                           |                           |                           | Blanco Fasnía             |                           |                           |                           |
|                                  | Fruit                     | Oral                      | Gastric                   | Intestinal                | Fruit                     | Oral                      | Gastric                   | Intestinal                |
| Indicaxanthin                    | 0.05 ± 0.00 <sup>b</sup>  | 0.03 ± 0.00 <sup>ab</sup> | 0.03 ± 0.01 <sup>ab</sup> | 0.02 ± 0.00 <sup>a</sup>  | 0.09 ± 0.01 <sup>c</sup>  | 0.04 ± 0.01 <sup>b</sup>  | 0.06 ± 0.00 <sup>bc</sup> | 0.03 ± 0.00 <sup>a</sup>  |
| Betanin                          | 0.03 ± 0.01 <sup>b</sup>  | 0.03 ± 0.01 <sup>b</sup>  | 0.01 ± 0.00 <sup>b</sup>  | n.d. <sup>a</sup>         | 0.01 ± 0.00 <sup>b</sup>  | n.d. <sup>a</sup>         | n.d. <sup>a</sup>         | n.d. <sup>a</sup>         |
| Piscidic acid                    | 44.33 ± 0.58 <sup>c</sup> | 29.25 ± 2.00 <sup>b</sup> | 29.04 ± 1.64 <sup>b</sup> | 12.70 ± 0.33 <sup>a</sup> | 35.41 ± 0.55 <sup>d</sup> | 29.42 ± 1.02 <sup>c</sup> | 26.02 ± 1.36 <sup>b</sup> | 16.68 ± 1.00 <sup>a</sup> |
| 4-hydroxybenzoic acid derivative | 1.34 ± 0.06 <sup>b</sup>  | 1.25 ± 0.03 <sup>b</sup>  | 0.18 ± 0.02 <sup>a</sup>  | 0.13 ± 0.03 <sup>a</sup>  | 1.23 ± 0.01 <sup>c</sup>  | 1.15 ± 0.01 <sup>c</sup>  | 0.44 ± 0.10 <sup>b</sup>  | 0.22 ± 0.03 <sup>a</sup>  |

Results were expressed as mean ± standard deviation (n=4). This came from obtaining at least two independent digestions (n=2) and performing the determinations of each two times (n=2). Superscript letters indicate statistically significant differences ( $p \leq 0.05$ ) between the fruit and the digestive stages for each variety and compound. Abbreviations: n.d.: not detected.
